# Supplementary figures and images for: Ultra-short helix pitch and spiral ordering in cholesteric liquid crystal revealed by resonant soft X-ray scattering
Source: Royal Society of Chemistry journal article supplement (doi:10.1039/d1sm01543e), 2021-11-29

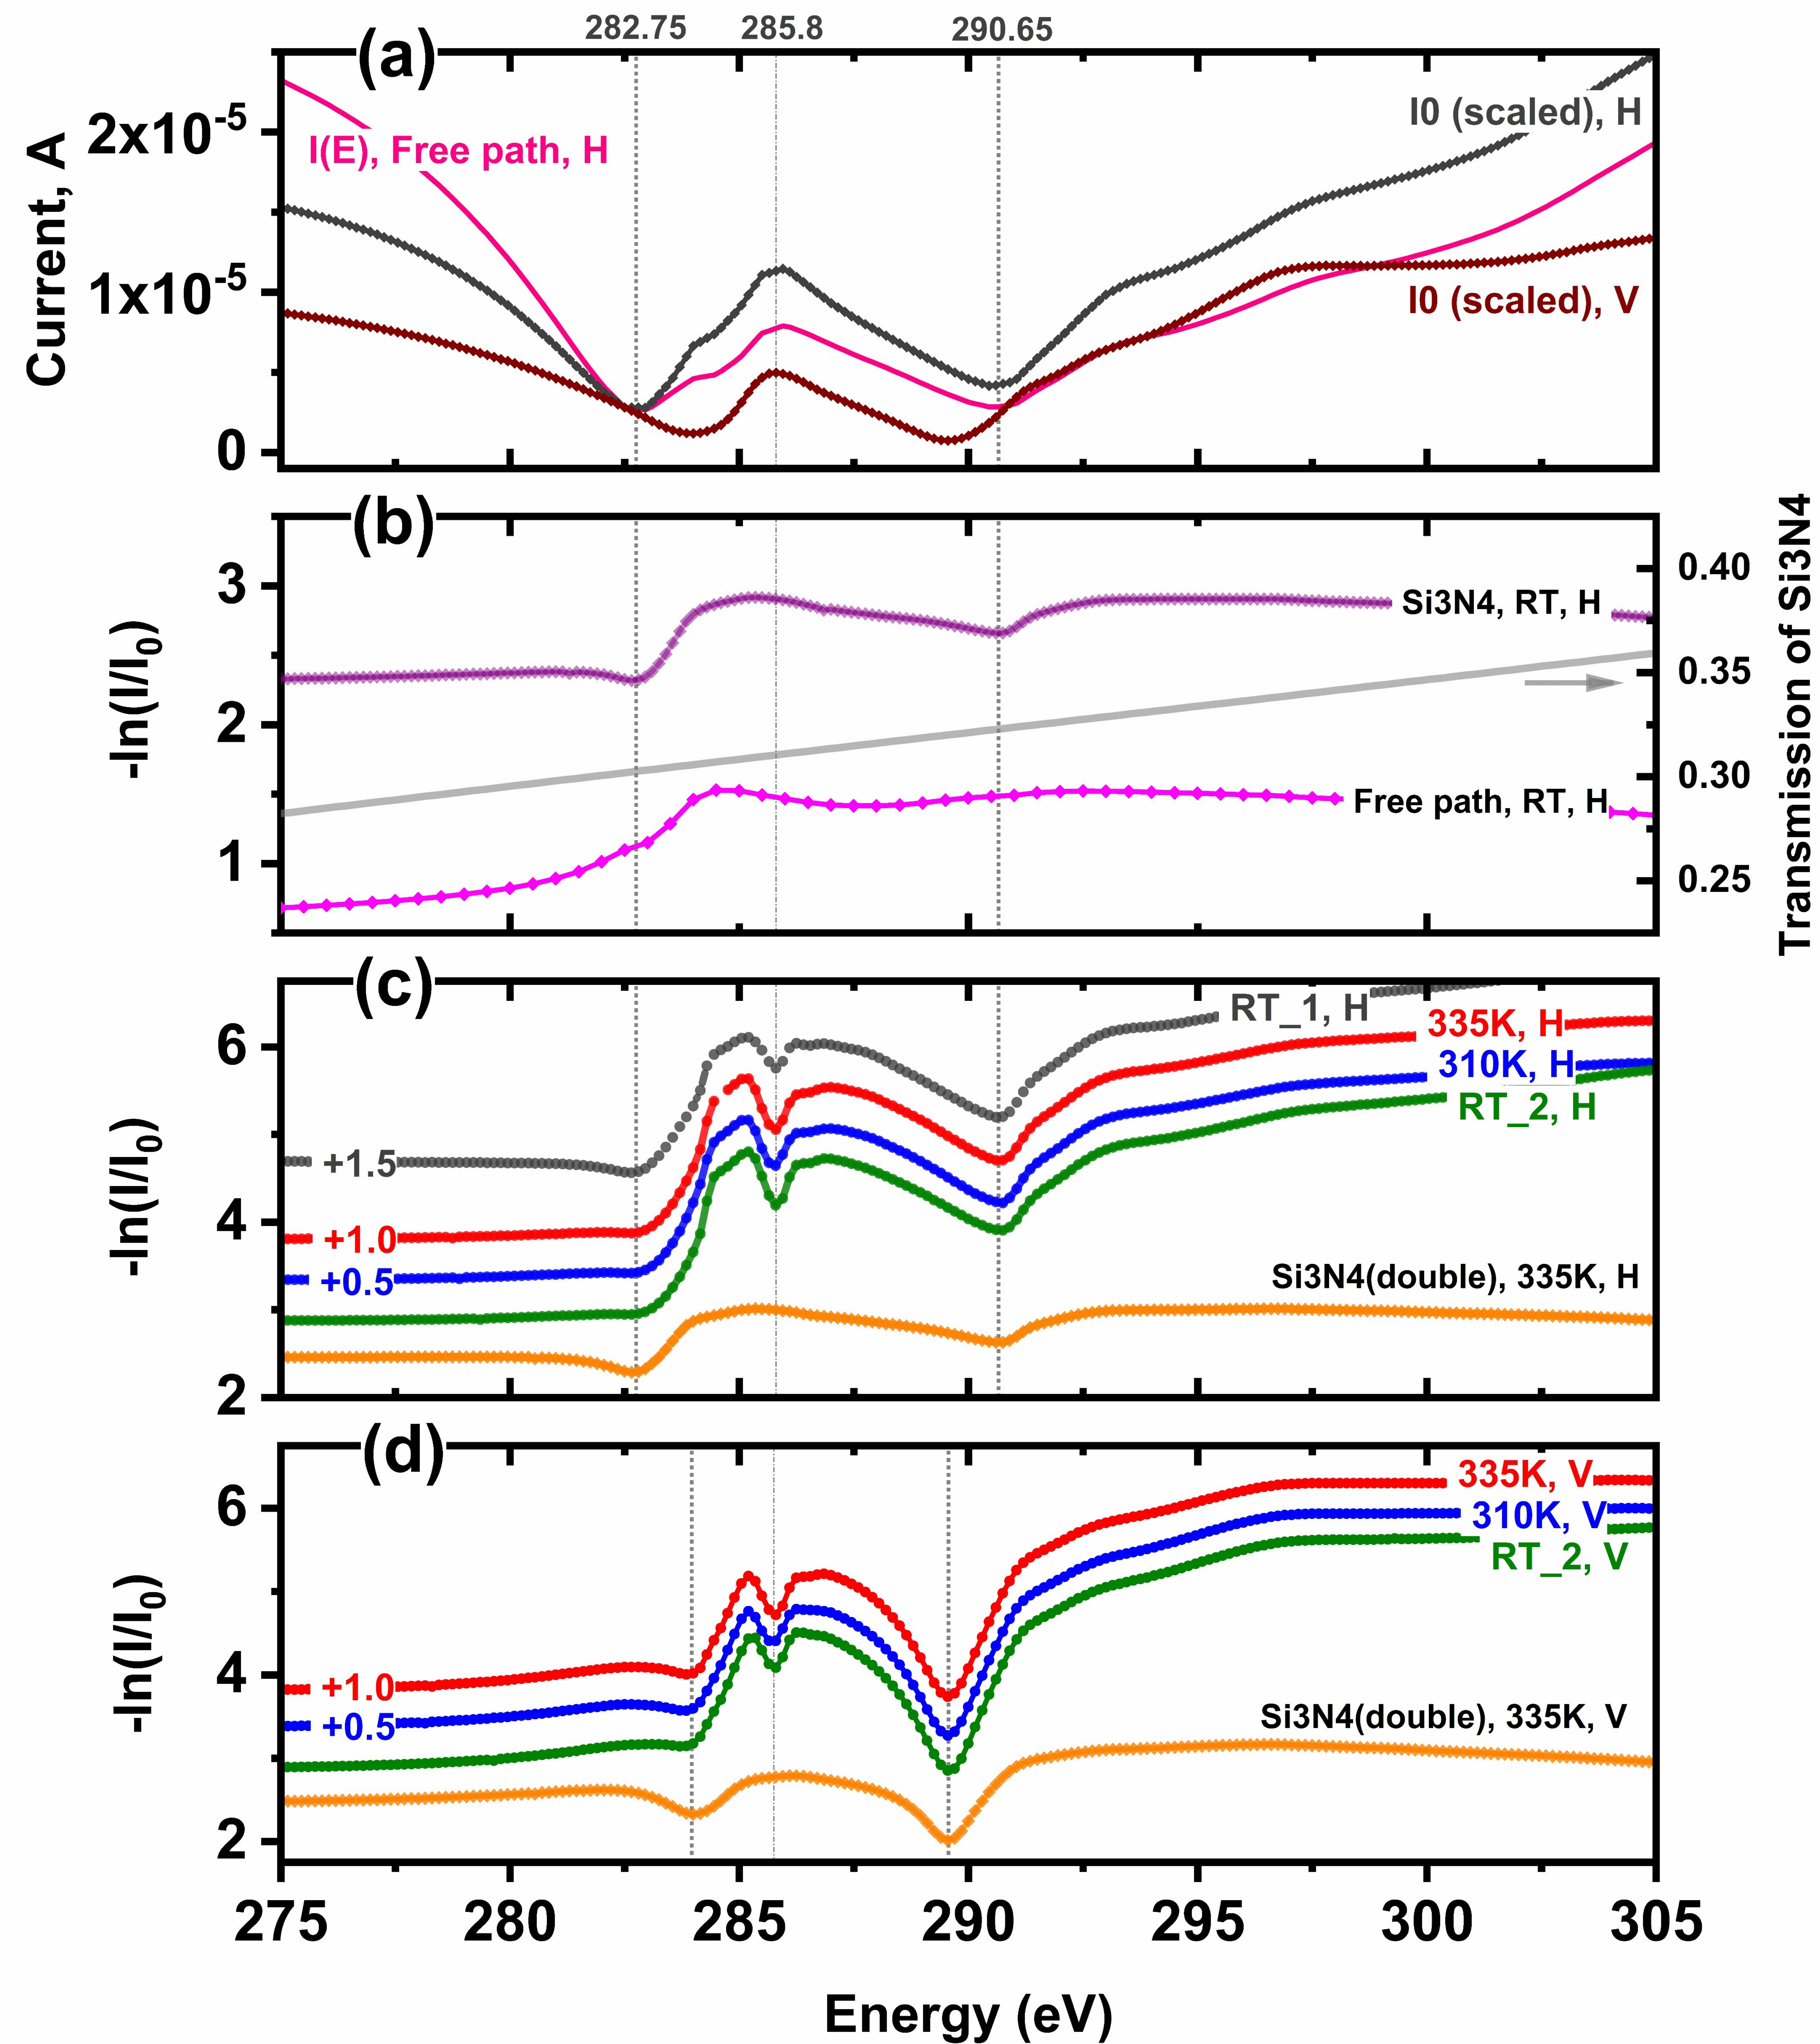

Supplement: d1sm01543e2.pdf [file d1sm01543e2.pdf]
